# Supplementary material for: A Δ38 Deletion Variant of Human Transketolase as a Model of Transketolase-Like Protein 1 Exhibits No Enzymatic Activity
Source: PubMed Central journal article supplement (PMC3485151; doi:10.1371/journal.pone.0048321), 2012-10-31
Supplement: pone.0048321.s001.pdf [file pone.0048321.s001.pdf]

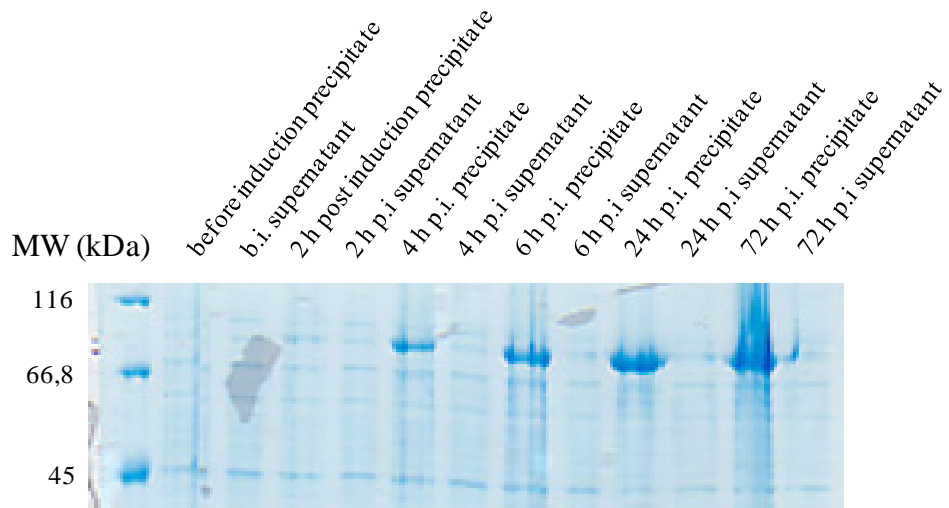

**Fig. S1.** Representative SDS-PAGE analysis of TKTL1 expression in *E. coli* BL21\*. Note that TKTL1 is not expressed in soluble form.
