# Supplementary material for: A Δ38 Deletion Variant of Human Transketolase as a Model of Transketolase-Like Protein 1 Exhibits No Enzymatic Activity
Source: PubMed Central journal article supplement (PMC3485151; doi:10.1371/journal.pone.0048321), 2012-10-31
Supplement: pone.0048321.s002.pdf [file pone.0048321.s002.pdf]

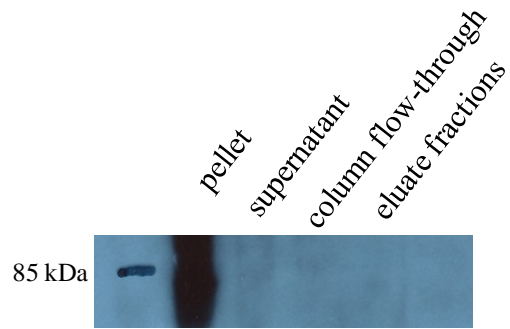

**Fig. S2.** Representative Western Blot analysis of TKTL1 expression in *Trichoplusi ni* Hi5 cells. Note the absence of soluble TKTL1 (supernatant and eluate of Ni-NTA column). Similar results were obtained for TKTL1 expression in Sf9 and Sf21 cells.
